# Supplementary material for: Reactive metabolites of acetaminophen activate and sensitize the capsaicin receptor TRPV1
Source: PubMed Central journal article supplement (PMC5630573; doi:10.1038/s41598-017-13054-3), 2017-10-06
Supplement: 41598_2017_13054_MOESM1_ESM.pdf [file 41598_2017_13054_MOESM1_ESM.pdf]

**Reactive metabolites of acetaminophen activate and sensitize  
the capsaicin receptor TRPV1**

Mirjam J Eberhardt <sup>a</sup>, Florian Schillers <sup>a</sup>, Esther M Eberhardt <sup>b</sup>, Linus Risser <sup>a</sup>, Jeanne de la Roche <sup>c</sup>, Christine Herzog <sup>a</sup>, Frank Echtermeyer <sup>a</sup>, Andreas Leffler <sup>a\*</sup>.

**Supplementary Information**

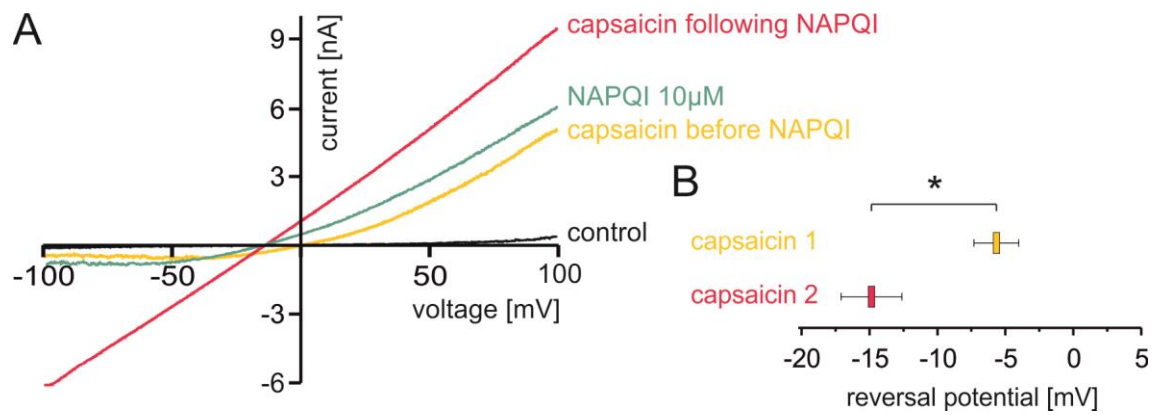

**Supplemental Figure 1. Application of NAPQI leads to altered sodium permeability in hTRPV1.** A NAPQI 10  $\mu$ M (3min) was applied following a capsaicin 0.1  $\mu$ M stimulus using patch clamp solutions containing sodium as the sole cation (internal: NaCl 140mM, EGTA 5mM, HEPES 5mM; external: NaCl 140mM, glucose 10mM, HEPES 10mM; pH was adjusted to 7.4 with NaOH). Ramp currents in the presence of a second capsaicin 0.1  $\mu$ M stimulus showed a leftward shift, as did the reversal potential (**B**) indicating a change in sodium permeability ( $p = 0.02$ ,  $n = 7$ ; Wilcoxon matched pairs test).

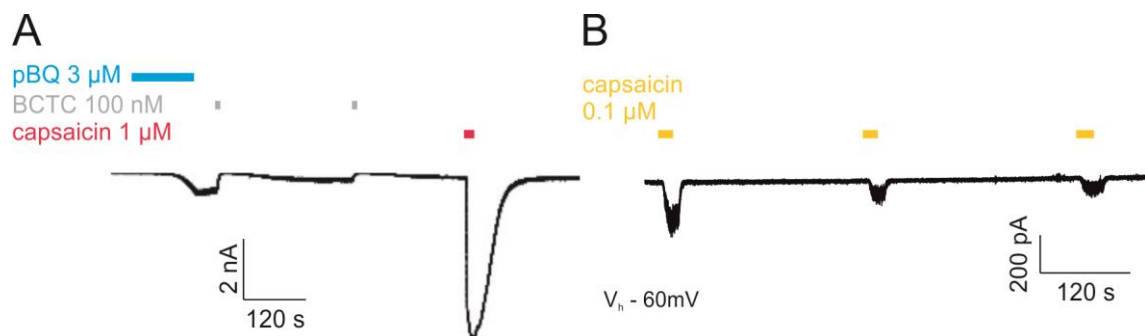

**Supplemental Figure 2.** A. 3  $\mu$ M pBQ evokes robust inward currents in hTRPV1-expressing cells held at -60 mV, which can only transiently be blocked by BCTC. B inward currents evoked by repeated capsaicin stimuli (0.1  $\mu$ M, 20 s) in hTRPV1-expressing cells show strong desensitization.

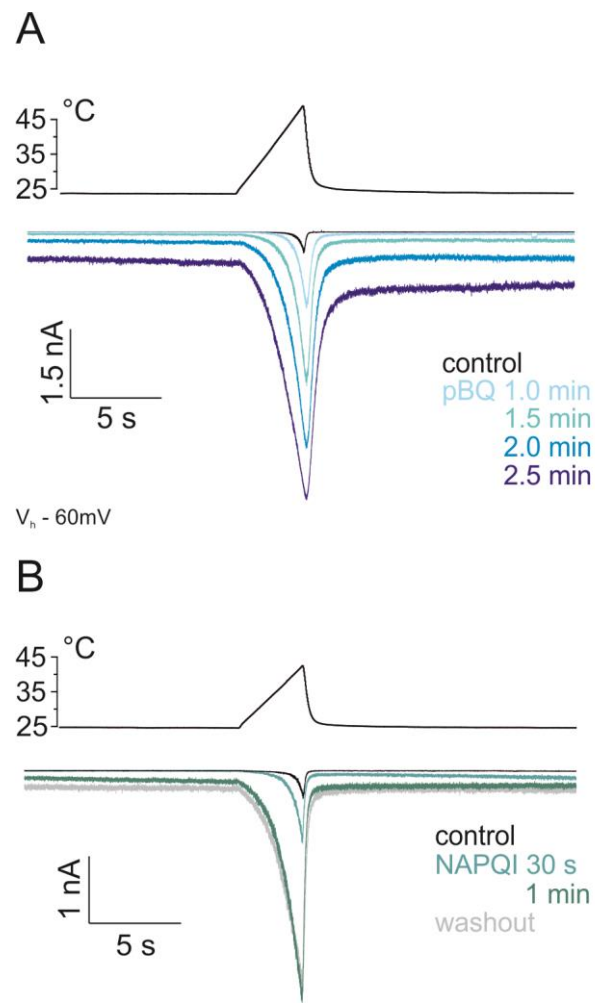

**Supplemental Figure 3. pBQ shifts temperature threshold of heat evoked currents in hTRPV1 to lower temperatures.** Overlay of all heat-induced currents of one representative recording in an hTRPV1 expressing cell. Note that with duration of pBQ (1  $\mu$ M) (**A**) and NAPQI (10  $\mu$ M) (**B**) application, temperature thresholds to evoke an inward current is continuously shifted to lower temperatures.

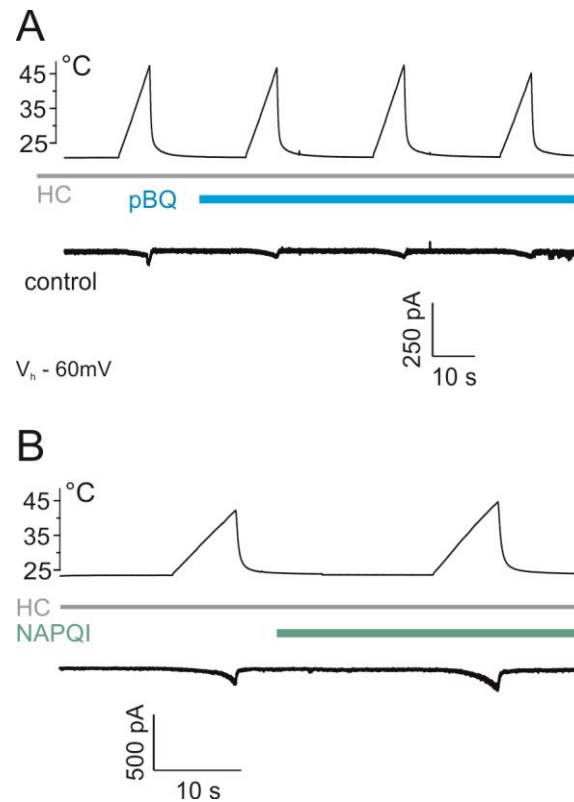

**Supplemental Figure 4. pBQ and NAPQI are ineffective in small capsaicin-negative DRG neurons.** TRPV1 mediates low threshold ( $\sim 45^\circ\text{C}$ ) heat-induced currents in small DRG neurons (Caterina et al., 2000). pBQ ( $10\mu\text{M}$ ) effectively sensitized heat-induced inward currents within 30s of application (Fig 2 H) in all capsaicin-positive neurons measured. (A) When pBQ was applied to small capsaicin-negative DRG neurons which were challenged by heat ramps (up to  $45^\circ\text{C}$ ), no currents were evoked even if pBQ was applied for two minutes ( $n = 2$ ). Similarly, in contrast to experiments performed in capsaicin-positive neurons (Fig. 2J), NAPQI ( $10\mu\text{M}$ ) had no effect in capsaicin-negative DRG neurons (B shows one of three measured neurons). TRPA1 was blocked in these experiments by the channel blocker HC030031.

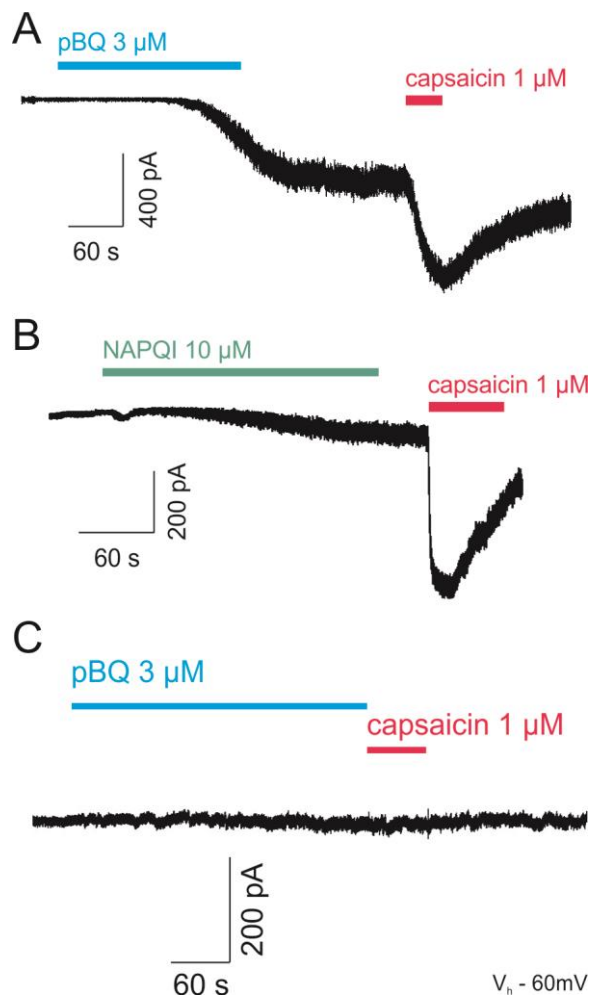

**Supplemental Figure 5. Inside-out macro patches:** pBQ (3  $\mu$ M, **A**) and NAPQI (10  $\mu$ M, **B**) evoked robust currents in inside out membrane patches of hTRPV1-expressing HEK 293 cells. Neither pBQ 3  $\mu$ M, nor capsaicin 1  $\mu$ M evokes any currents in inside-out macro patches of untransfected HEK 293 cells (**C**).

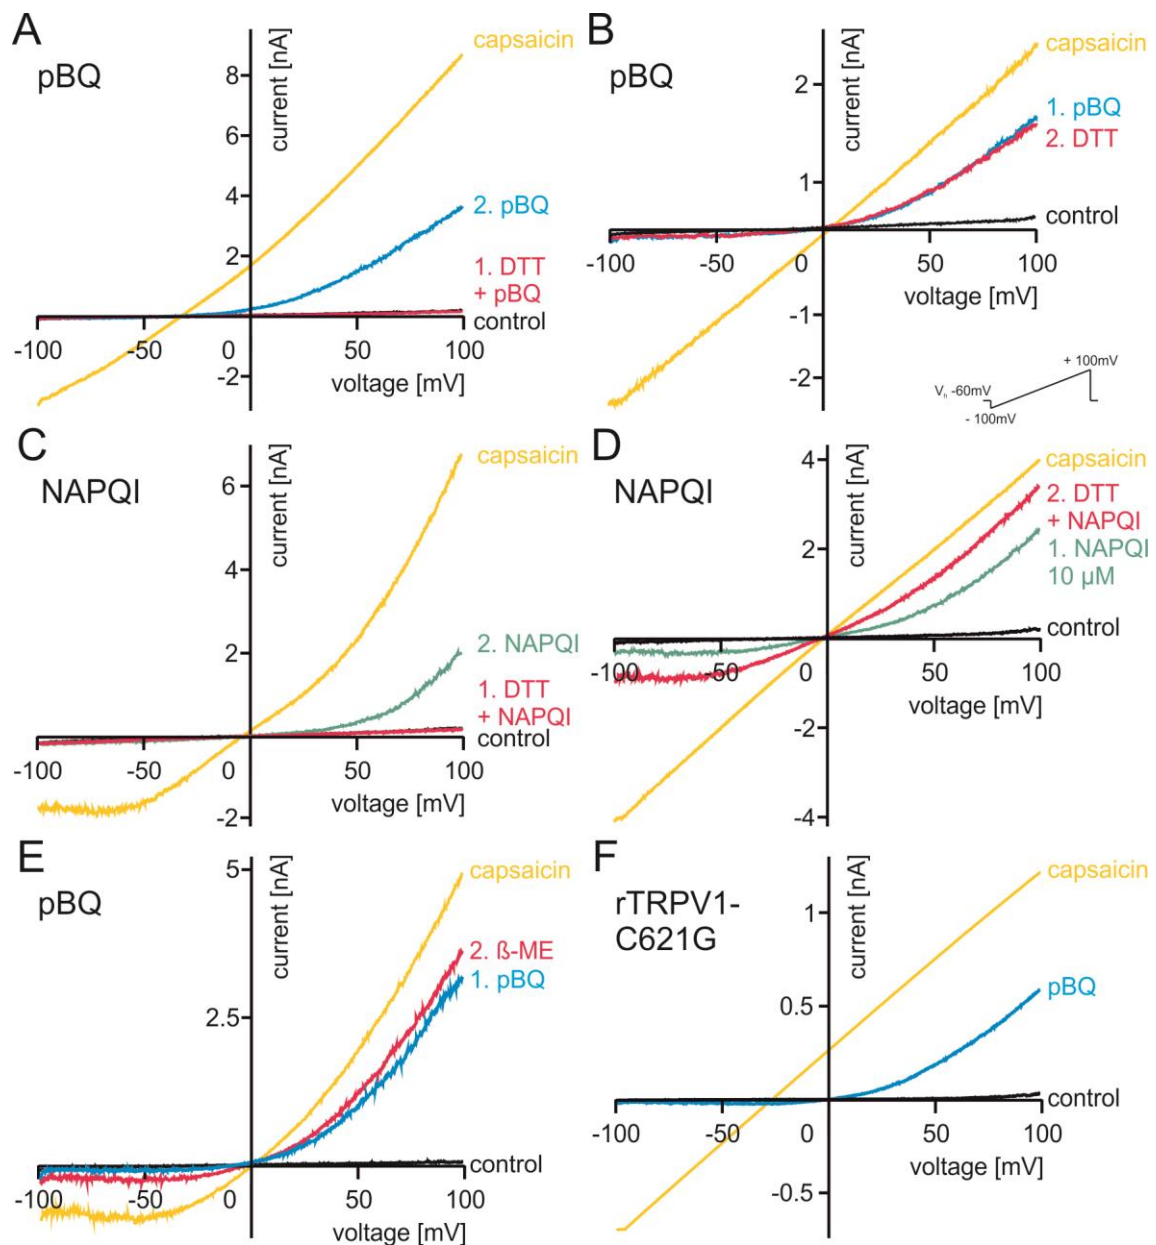

**Supplemental Figure 6.** A-D. Co-application of dithiothreitol (DTT, 5 mM, at least 4min) prevents sensitization of ramp currents in hTRPV1 by pBQ (A) and NAPQI (C), while a second application of these reactive acetaminophen metabolites alone for 1.5 – 3minutes again sensitizes hTRPV1. If it is applied once the ramp currents have been sensitized, DTT (5mM,  $\geq 4$  min) does not reverse the effects of pBQ (1 $\mu$ M, 3min B) or NAPQI (10 $\mu$ M, 3min D). E.  $\beta$ -mercaptoethanol (1 mM, 5min) is also not able to reverse sensitization of TRPV1 once pBQ-induced increase of voltage ramp-induced currents has been fully established. F. pBQ (1 $\mu$ M, 1.5 min) still sensitizes currents on an rTRPV1 mutant lacking the cysteine C621G.

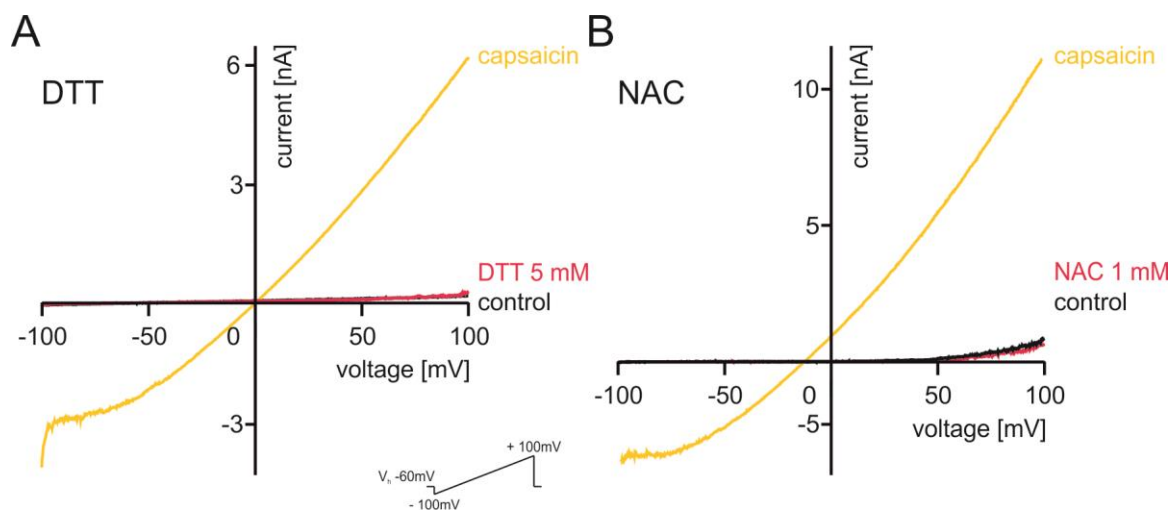

**Supplemental Figure 7.** Dithiothreitol 5 mM (DTT, **A**) and N-acetylcysteine (NAC, **B**) do not sensitize voltage ramp-induced currents in hTRPV1, even if applied for several minutes.

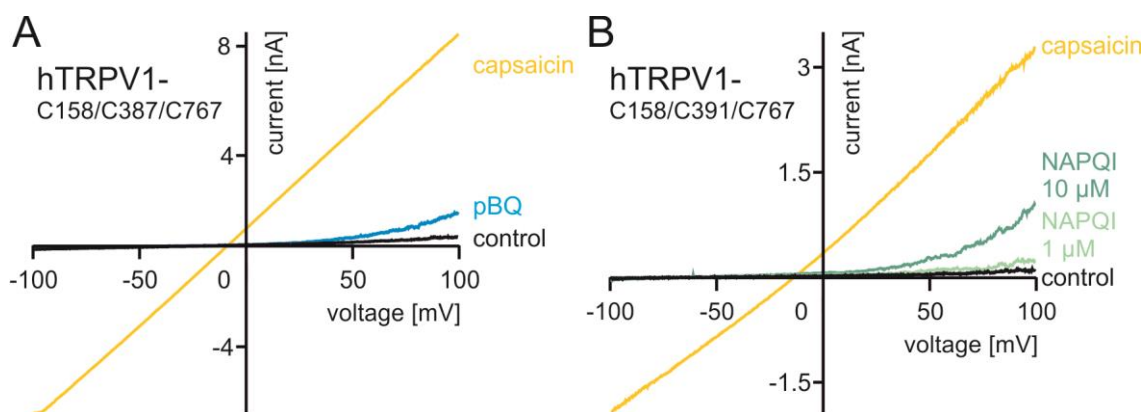

**Supplemental Figure 8.** A. Mutation of internal cysteines in hTRPV1 reduces sensitization of voltage ramp-induced current by pBQ (C158S/C387S/C767S-hTRPV1). B. However, higher concentrations of NAPQI (10  $\mu$ M) sensitize C158S/C391S/C767S-hTRPV1 (pBQ and both concentrations of NAPQI were applied for five minutes). These cysteines are also involved in sensitization of capsaicin- and proton-induced inward currents by reactive acetaminophen metabolites.

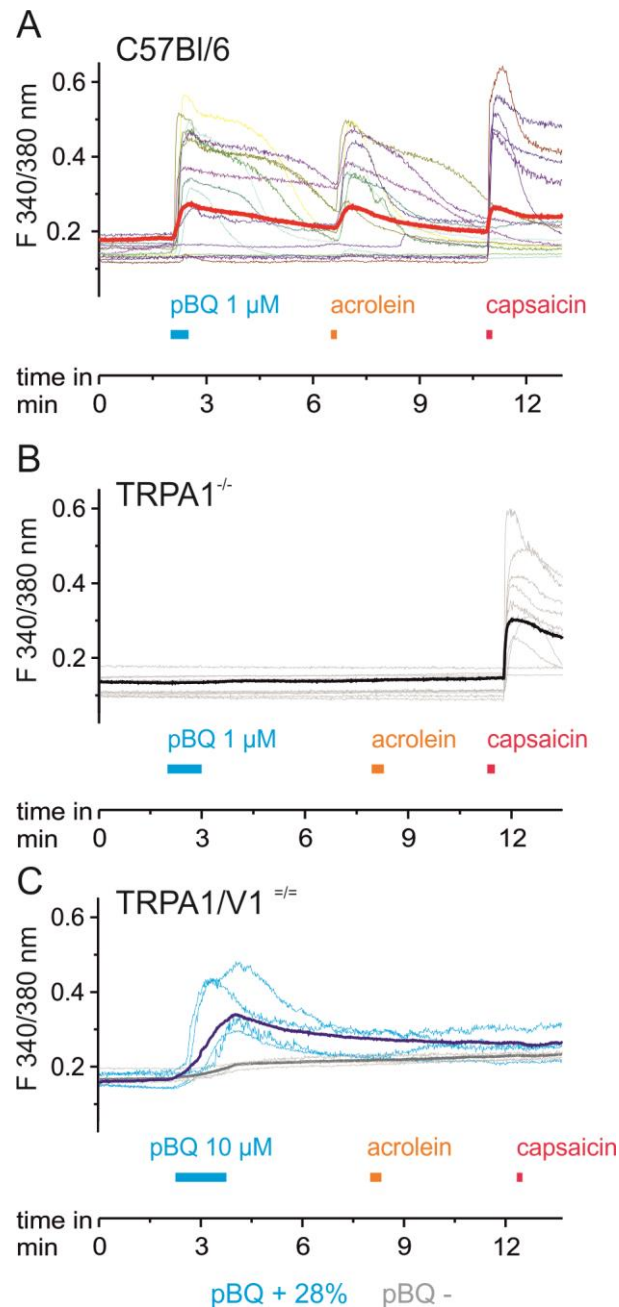

**Supplemental Figure 9. pBQ induces rise in intracellular calcium in DRG neuron of TRPV1/TRPA1 double knockout mice.** **A.** pBQ 1 μM induces calcium influx in DRG neurons of C57BL/6 mice given as mean of all measured cells (bold red trace, n = 39) and representative measurements (thin traces) due to activation of TRPA1.<sup>5</sup> **B.** These responses are absent in DRG neurons from TRPA1-knockout mice (n = 78). **C.** However, 10 μM pBQ also induce increases in intracellular calcium in 28 % of neurons of TRPA1/TRPV1 double-knockout mice. Traces show pBQ-responsive (blue) and neurons not responding to pBQ (gray), a small increase in the signal is observed in all cells during exposure to 10 μM pBQ (n = 303, mean bold trace, thin traces representative measurements).



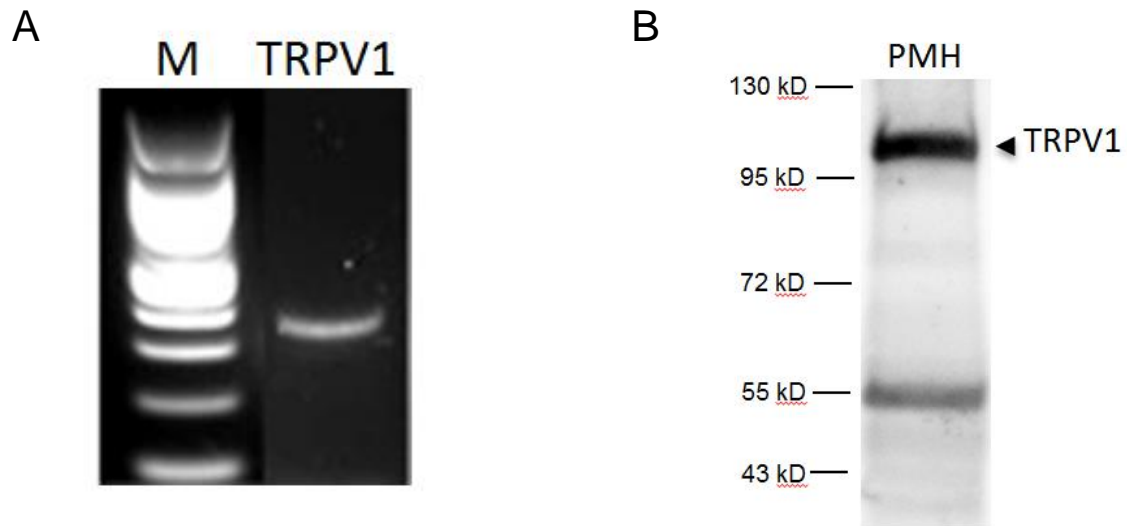

**Supplemental Figure 10.** Expression of TRPV1 has been shown by mRNA and western blot in HEPG2, HUH7 and primary mouse hepatocytes (PMH).<sup>21</sup> In accordance to these findings, we observed expression of TRPV1 by rtPCR (**A**) and western blot (**B**) in cultured primary mouse hepatocytes.

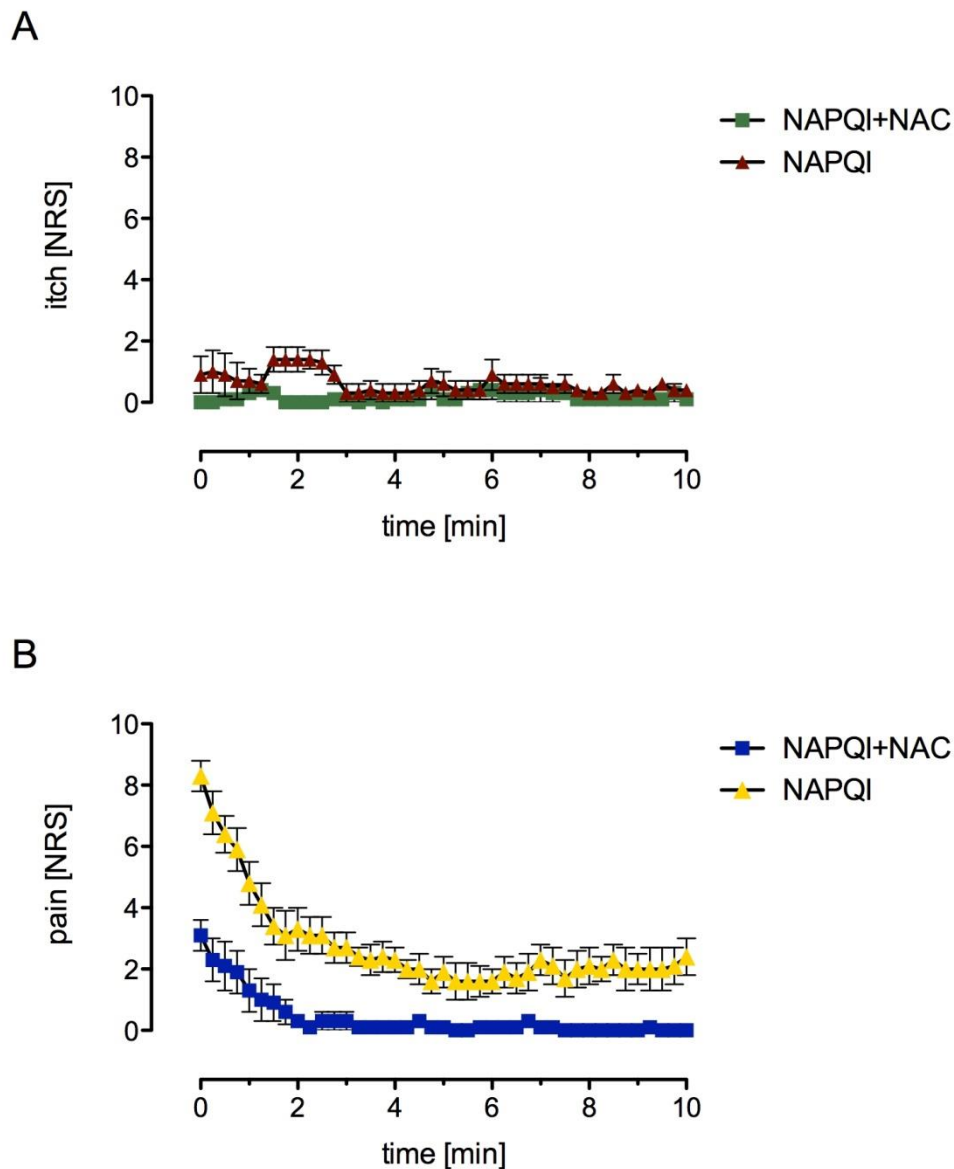

**Supplemental Figure 11. Besides pain intracutaneous injection of NAPQI induces mild itching sensations.** **A.** Magnitude and time course of NAPQI (10 mM)-evoked itch in human volunteers ( $n = 7$ ) after intracutaneous injection to the volar forearm (lower panel). Itch was rated on a numerical rating scale (NRS) from 0 to 10 (a sensation of NRS 3 implies the beginning urge to scratch, mean  $\pm$  SEM). **B.** Magnitude and time course of NAPQI-induced pain are given for comparison (see also figure 9A).

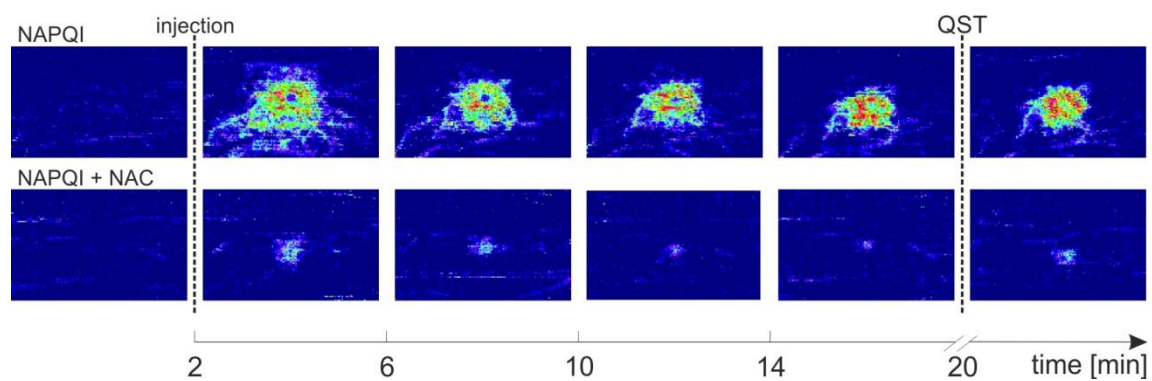

**Supplemental Figure 12. NAPQI-induced axon reflex erythema.** Complete series of laser Doppler scans taken before and every 2 minutes after double-blind intracutaneous injection of NAPQI or NAPQI co-injected with NAC to the volar forearm of one human volunteer. While there is a strong axon reflex erythema induced by neuropeptide release following antidromic activation of wide branching C-fibers after NAPQI injection, this response is reduced by co-application of NAC.
